# Supplementary material
Source: PubMed Central journal article supplement (PMC5354984)
Supplement: NIHMS845754-supplement-Supp_info.pdf [file NIHMS845754-supplement-Supp_info.pdf]

**In situ immunopathological changes in cutaneous leishmaniasis due to *Leishmania donovani***

Nuwani H Manamperi<sup>a</sup>, Steve Oghumu<sup>b</sup>, Nishantha Pathirana<sup>c</sup>, Vipula C de Silva<sup>d</sup>,  
Wimaladharma Abeyewickreme<sup>a</sup>, Abhay R Satoskar<sup>e</sup>, Nadira D Karunaweera<sup>f\*</sup>

<sup>a</sup> Department of Parasitology, Faculty of Medicine, University of Kelaniya, P.O. Box 06,  
Thalagolla Road, Ragama, Sri Lanka

<sup>b</sup> Department of Environmental Health Sciences, College of Public Health, Ohio State  
University, Columbus, OH, USA

<sup>c</sup> Department of Dermatology, Army Hospital, Colombo-05, Sri Lanka

<sup>d</sup> Department of Pathology, Faculty of Medicine, University of Colombo, P. O. Box. 271, Kinsey  
Road, Colombo-08, Sri Lanka

<sup>e</sup> Department of Pathology, Wexner Medical Center, Ohio State University, Columbus, OH, USA

<sup>f</sup> Department of Parasitology, Faculty of Medicine, University of Colombo, P. O. Box. 271,  
Kinsey Road, Colombo-08, Sri Lanka

\*Correspondence: Prof. Nadira D. Karunaweera, Department of Parasitology, Faculty of  
Medicine, University of Colombo, P. O. Box. 271, Kinsey Road, Colombo-08, Sri Lanka. Tel.:  
+94 11 2699284, Fax: +94 11 2699284, e-mail address: [nadira@parasit.cmb.ac.lk](mailto:nadira@parasit.cmb.ac.lk)

**Table S1.** Study and control group characteristics

|                                    | Study group<br>(n = 58) | Control group<br>(n = 25) | P value           |
|------------------------------------|-------------------------|---------------------------|-------------------|
| Male: Female                       | 37: 21                  | 17: 8                     | 0.72 <sup>a</sup> |
| Median age <sup>b</sup> (IQ range) | 31.5 (25.7-43)          | 39.0 (26.5-50)            | 0.19 <sup>c</sup> |

<sup>a</sup> Pearson's Chi-Squared test; <sup>b</sup> age in years; <sup>c</sup> Mann-Whitney U test

Abbreviations: IQ, interquartile.

**Figure S1.** Epidermal changes seen in histopathology

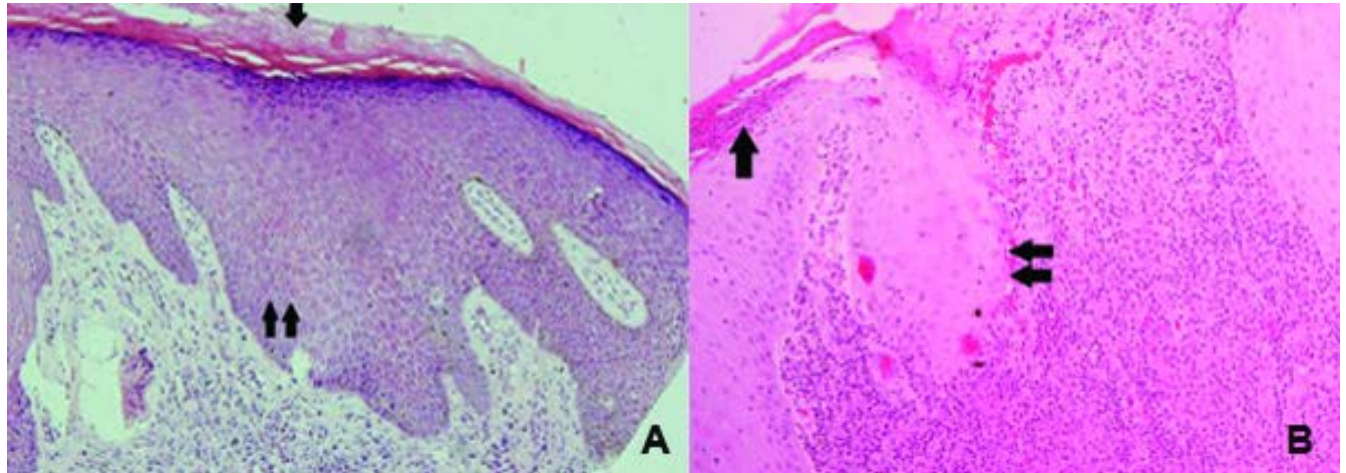

Histological changes seen in the epidermis of H & E stained sections of cutaneous lesions caused by *L. donovani* in Sri Lanka. Picture A demonstrate hyperkeratosis (single arrow) and irregular acanthosis (double arrows) and picture B shows parakeratosis (single arrow) and follicular plugging (double arrows).
